# Supplementary material for: Diurnal, seasonal and solar cycle variation of total electron content and comparison with the IRI-2016 model at Birnin Kebbi
Source: Copernicus journal article supplement (doi:10.5194/angeo-2018-134), 2019-01-16
Supplement: Supplementary file [file angeo-2018-134-SC1-supplement.pdf]

# DIURNAL, SEASONAL AND SOLAR CYCLE VARIATION OF TOTAL ELECTRON CONTENT AND COMPARISON WITH IRI-2016 MODEL AT BIRNIN-KEBBI

Aghogho Ogwala,<sup>1,\*</sup>Emmanuel Olufemi Somoye,<sup>1</sup>Olugbenga Ogunmodimu.,<sup>3</sup>Rasaq

Adewemimo Adeniji-Adele,<sup>1</sup>Eugene Oghenakpobor Onori,<sup>1</sup>Oluwole Oyedokun<sup>2</sup>

<sup>1,\*</sup> Department of Physics, Lagos State University, Lagos, Nigeria.

<sup>2</sup> Department of Physics, University of Lagos, Nigeria.

<sup>3</sup> Department of Electrical Engineering, Manchester Metropolitan University, United Kingdom.

## ABSTRACT

Total Electron Content (TEC) is an important ionospheric parameter used to monitor possible space weather impacts on satellite to ground communication and satellite navigation system. TEC is modified in the ionosphere by changing solar Extreme Ultra-Violet (EUV) radiation, geomagnetic storms, and the atmospheric waves that propagate up from the lower atmosphere. Therefore, TEC depends on local time, latitude, longitude, season, geomagnetic conditions, solar cycle activity, and condition of the troposphere. A dual frequency GPS receiver located at an equatorial station, Birnin-Kebbi in Northern Nigeria (geographic location: 12.64°N; 4.22°E; 2.68°N dip), has been used to investigate variation of TEC during the period of 2011 to 2014. We investigate the diurnal, seasonal and solar cycle dependence of observed (OBS) TEC and comparison with latest version of International Reference Ionosphere (IRI-2016) model. On a general note, diurnal variation reveals discrepancies between OBS-TEC and IRI-2016 model for all hours of the day except during the post-midnight hours. Slight post-noon peaks in the daytime maximum and post-sunset decrease and enhancement are observed in the diurnal variation of OBS-TEC of some months. On a seasonal scale, we observed that OBS-TEC values were higher in the

equinoxes than the solstices only in 2012. Where as in 2011, September equinox and December solstice recorded higher magnitude followed by March equinox and lowest in June solstice. In 2013, December solstice magnitude was highest, followed by the equinoxes and lowest in June solstice. In 2014, March equinox and December solstice magnitude were higher than September equinox and June solstice magnitude. June solstice consistently recorded the lowest values for all the years. OBS-TEC is found to increase from 2011 to 2014, thus revealing solar cycle dependence.

**KEYWORDS:** TEC; diurnal; seasonal; variation; solar cycle 24; IRI-2016.

**CORRESPONDING AUTHOR PHONE:** +234 8055650264

**CORRESPONDING AUTHOR E-MAIL:**[ogwala02@gmail.com](mailto:ogwala02@gmail.com)

## INTRODUCTION

The ionosphere causes a variation in the intensity of radio signals – fading – as a result of irregularities (inhomogeneity in electron density) (Somoye, 2010; Ogwala *et al.* 2018, Ogunmodimu *et al.* 2018). Akala *et al.*, (2011) reported that the variable nature of the equatorial/ low latitude ionosphere threatens communication and navigation/ satellite systems. The equatorial/ low latitude ionosphere exhibits many unique features such as the seasonal anomaly, semi-annual anomaly, equinoctial anomaly, noon bite-out, spread-F, equatorial electrojet (EEJ), equatorial plasma bubbles (EPB) (Stankov, 2009; Maruyama *et al.*, 2004; Jee *et al.*, 2004; Codrescu *et al.*, 1999).

For many decades, scientists have been studying these ionospheric features and the role they play in trans-ionospheric electromagnetic radio wave propagation. These studies are carried out using different techniques and instruments. One of the instruments used is the GPS receiver, which provide direct measurements from satellites. Their sounding capacity extends to the topside of the ionosphere, but is affected by time and space constraints (Ciraolo and Spalla, 2002). Recently, GPS receiver is the most efficient method used to eliminate the effect of the ionosphere on radio signals. This method combines signals in different L band frequencies, L1 (1575 MHz) and L2 (1228 MHz).

Almost all space geodetic techniques transmit signals in at least two different frequencies for better accuracy (Alizadeh *et al.*, 2013). These are combined linearly and can greatly eliminate the effect of the ionosphere on radio signals. The ionospheric effect on radio signal is proportional to total electron content (TEC), which is defined as the number of electrons per square meter from satellite in space to receiver on ground is shown in equation (1).

$$TEC = \int n_e(s)ds \quad (1)$$

It is measured in multiples of TEC units (1 TECU =  $10^{16}$  el/m<sup>2</sup>). Due to the dispersive nature of the ionosphere, there is a time delay between the two frequencies of a GNSS signal as it propagates through the ionosphere as shown in Equation (2) as  $\Delta t = t_2 - t_1$ . Thus,

$$\Delta t = \left( \frac{40.3}{c} \right) \times \frac{TEC}{\left[ \left( \frac{1}{f_2^2} \right) - \left( \frac{1}{f_1^2} \right) \right]} \quad (2)$$

Where  $c$  is speed of light and  $f$  is frequency. Hence,  $\Delta t$  measured between the L1 and L2 frequencies is used to evaluate TEC along the ray path.

When Global Navigation Satellite System (GNSS) signals propagate through the ionosphere, the carrier experiences phase advance and the code experiences a group delay due to the electron density along the line of sight (LOS) from the satellite to the receiver (Bagiya *et al.*, 2009; Tariku, 2015). Thus, the carrier phase pseudo ranges are measured too short, and the code pseudo ranges are measured too long compared to the geometric range between the satellite and the receiver. This results in a range error of the positioning accuracy provided by a GPS receiver. The range error due to TEC in the ionosphere varies from hundreds of meters at mid-day, during high solar activity when the satellite is near the horizon of the observer, to a few meters at night during low solar activity, with the satellite positioned at zenith angle (Bagiya *et al.*, 2009). By measuring this delay using dual frequency GPS receivers, properties of the ionosphere can be inferred and used to monitor space weather events such as GNSS, HF communications, Space Based Observation Radar and Situational Awareness Radar, etc. It is documented that ionospheric delay which is proportional to TEC is the highest contributor to GPS positioning error (Alizadeh *et al.*, 2013; Akala *et al.*, 2013).

TEC in the ionosphere can also be studied using empirical ionospheric model such as the International Reference Ionosphere (IRI). IRI is a joint undertaking by the Committee on Space

Research (COSPAR) and International Union of Radio Science (URSI) with the goal of developing and improving an international standard for the parameters in earth's ionosphere (Bilitza *et al.*, 2014). An updated version has been developed recently to cater for lapses of previous models. IRI provides the vertical TEC (VTEC) from the lower boundary (60 – 80 km) to a user-specific upper boundary (Bilitza *et al.*, 2016).

In the past few decades, studies on the temporal and spatial variations of TEC have gained popularity in the scientific community (Wu *et al.*, 2008). However, understanding the variability of TEC will also go a long way in obtaining the positioning accuracy of GNSS under disturbed and quiet conditions. The global distribution of TEC variations and its characteristics at all latitudes, during different solar cycle phases under disturbed and quiet conditions have been investigated by some researchers (Bhuyan and Borah, 2007; Maruyama *et al.*, 2004; Jee *et al.*, 2004).

Rama Rao *et al.* (2006a, b); Wanninger (1993) reported maximum day-to-day variability in TEC at the Equatorial Ionization Anomaly (EIA) crest regions, increasing peak value of TEC with increase in integrated equatorial electrojet (IEEJ) strength, maximum monthly average diurnal variations during equinox months followed by winter months and lowest during summer months. They also reported positive correlation of TEC and EEJ and the spatial variation of TEC in the equatorial region. Titheridge (1974) and Langley *et al.* (2002) attributed the lower TEC values during the summer seasons to low ionization density resulting from reduced O/ N<sub>2</sub> ratio (production rates) which is a result of increased scale height. Bhuyan and Borah (2007); Komjathy *et al.* (1998); Lee and Reinisch (2006) compared TEC derived from GPS receivers with IRI model in the equatorial/ low latitude sector and inferred that the diurnal amplitude of TEC is higher during the equinoxes followed by December solstices and lowest in June solstice, i.e., observing winter

anomaly in seasonal variation. Malik *et al.* (2016) reported higher IRI values than observed maximum useable frequency (MUF) values but behaves similarly diurnally and seasonally with no clear trend. Akala *et al.* (2013) on the comparison of equatorial GPS-TEC observations over an African station and an American station during the minimum and ascending phases of solar cycle 24 reported that seasonal VTEC values were maximum and minimum during March equinox and June solstice respectively, during minimum solar cycle phase at both stations. They also reported that during the ascending phase of solar cycle 24, minimum and maximum seasonal VTEC values were recorded during December solstice and June solstice respectively. They further showed that IRI-2007 model predicted better in the American sector than the African sector.

The aim of this paper is (i) to characterize TEC on diurnal, seasonal and solar cycle scales in the Nigerian Equatorial ionosphere (ii) to compare OBS-TEC with IRI-2016 model in order to find if the model underestimates or overestimates TEC values at the African longitudinal sectors.

## **DATA AND METHODOLOGY**

### **2.1 DATA**

The Receiver Independence Exchange (RINEX) Observation GPS data files were downloaded daily from NIGNET website ([www.nignet.net](http://www.nignet.net)) and processed using Bernese software and GPS TEC analysis software. The RINEX file contains 60 iteration data (i.e. in 1 minute time resolution). The GPS-TEC analysis software was designed by Gopi Seemala of the Indian Institute of Geomagnetism. The summary of this application are, reads raw data, processes cycle slips in phase data, reads satellite biases from the International GNSS services (IGS) code files (and calculates them if unavailable), and calculates receiver bias, inter-channel biases for different satellites in the constellation, and finally plots the VTEC values on the screen and writes the ASCII

output files (\*CMN) for STEC and (\*STD) for VTEC in the same directory of the data files. Effect due to multipath is eliminated by using a minimum elevation angle of 50°.

Observation GPS-TEC obtained from the TEC analysis software is the slant TEC (STEC) and vertical TEC (VTEC). STEC is polluted with several biases that must be eliminated to get VTEC. VTEC is calculated from the daily values of STEC using equation (3).

$$VTEC = (STEC - [b_R + b_S + b_{RX}])/S(E) \quad (3)$$

Where  $b_R$ ,  $b_S$ , and  $b_{RX}$  are receiver bias, satellite bias receiver interchannel bias respectively.  $S(E)$ , which is the oblique factor with zenith angle,  $z$  at IPP (Ionospheric Pierce Point) is expressed in equation (4).

$$S(E) = \frac{1}{\cos(z)} = \left\{ 1 - \left( \frac{R_E \times \cos(E)}{R_E + h_S} \right)^2 \right\}^{-0.5} \quad \text{Bolaji et al. (2012)} \quad (4)$$

$R_E$  = the mean radius of the earth in km and  $h_S$  = ionospheric height from the surface of the earth. According to Rama Rao *et al.*, (2006c), ionospheric shell height of approximately 350km is appropriate for the equatorial/ low latitude region of the ionosphere for elevation cut off angle of > 50°. This is valid in this study.

Hourly VTEC data obtained from these processing software are averaged to daily TEC values in TEC units ( $1 \text{ TECU} = 10^{16} \text{ el/m}^2$ ). OBS-TEC from Birnin-kebbi, on geographic Latitude 12.47°N and geographic Longitude 4.23°E located in Northern Nigeria, obtained during the period 2011 – 2014, which corresponds to the ascending (2011 – 2013) and maximum (2014) phases of solar cycle 24 were compared with derived TEC obtained from International Reference Ionosphere (IRI-2016) model website ([https://ccmc.gsfc.nasa.gov/modelweb/models/iri2016\\_vitmo.php](https://ccmc.gsfc.nasa.gov/modelweb/models/iri2016_vitmo.php)). The 2016 version of IRI provides important changes and improvements on previous IRI versions (Bilitza *et al.*, 2016). Solar cycle 24 is regarded as a quiet solar cycle which peaked in 2014 with maximum sunspot number (103) occurring in February. Values of sunspot number,  $R_z$ , in Text

format were obtained from Space Physics Interactive Data Resource (SPIDR) website ([www.ionosonde.spidr.com](http://www.ionosonde.spidr.com)) before it became unavailable. Table 1 shows the years used in this study and their corresponding sunspot number,  $R_z$ .

Table I: Table of years, solar cycle phase and sunspot number,  $R_z$  [Source: Author].

| Years | Solar Cycle Phase | Sunspot Number, $R_z$ |
|-------|-------------------|-----------------------|
| 2011  | Ascending         | 55.7                  |
| 2012  | Ascending         | 57.6                  |
| 2013  | Ascending         | 64.7                  |
| 2014  | Maximum           | 79.6                  |

## 2.2 METHODOLOGY

Diurnal variations of hourly OBS-TEC and hourly IRI-2016 model (NeQuick topside option) were plotted using the monthly mean values of OBS-TEC and monthly mean of IRI-2016 model against local time (LT) on the same Figure. The corresponding percentage deviation (percentage Dev or % DEV) of IRI-2016 from OBS-TEC were also analysed using the monthly mean values of OBS-TEC and monthly mean values of IRI-2016 against local time (LT). Percentage Dev is obtained using equations (5) below:

$$\%DEV = \left( \frac{OBS-IRI}{OBS} \right) \times 100 \quad (5)$$

where OBS represents Observation-TEC values and IRI represents TEC derived by IRI-2016 model.



The OBS-TEC data was grouped following Onwumechilli and Ogbuehi (1964) into four seasons namely: March equinox (February, March and April), June solstice (May, June and July), September equinox (August, September and October) and December solstice (November, December and January), in order to investigate seasonal variation. Finally, Annual variation of OBS-TEC and sunspot number,  $R_z$  were also analysed by plotting mean OBS-TEC and mean  $R_z$  against each month of the year.

## RESULT AND DISCUSSIONS

Figures 1 to 4 shows the diurnal variation of OBS-TEC and IRI-2016 model in the Nigerian Equatorial Ionosphere (NEI) for the years 2011 to 2014 respectively. OBS-TEC were obtained from the GPS receiver installed at Birnin-Kebbi station. The diurnal variation of OBS-TEC and IRI-2016 model TEC reveals the typical characteristics of an equatorial/ low latitude ionosphere. Generally, the day-to-day variation of OBS-TEC have been indicated using the top and bottom error bar. The study reveals that day-to-day variation of OBS-TEC is higher during the daytime than night time for all the years. It well known fact that during the day, the sun causes variations in temperature, neutral wind, electron density and electric field thereby modulating the structure and evolution of the ionosphere and thermosphere (Gorney, 1990; Forbes *et al.* (2006). These Figures shows a steep rise in OBS-TEC from a minimum of ~2 TECU between 03:00 – 05:00 LT in 2011, ~3 TECU (04:00 – 05 LT) in 2012, ~3 TECU (03:00 – 05:00 LT) in 2013 and 2014. OBS-TEC increased to a broad daytime maximum between 12:00 LT – 14:00 LT for all years before falling to a minimum after sunset. The diurnal variation of IRI-2016 model shows TEC increasing from a minimum of ~ 2 TECU in 2011, ~ 4 TECU in 2012 and 2013, and ~ 5 TECU in 2014 between 03:00 – 04:00 LT for all years, to a broad daytime peak between 08:00 – 14:00 LT, before falling steeply to minimum before sunset. Hence the IRI-2016 model attained its peak before OBS-

TEC. Dabas *et al.* (2003); Somoye *et al.* (2011); Hajra *et al.* (2016); D’ujanga *et al.* (2017) attributed the steep increase in TEC to solar EUV ionization and upward vertical  $E \times B$  resulting from the rapid filling up of the magnetic field tube at sunrise and meridional winds (Suranya *et al.*, 2015). These magnetic field tubes collapse after sunset due to low thermospheric temperature and Releigh Taylor Instability (RTI) (Ayorinde *et al.*, 2016) giving rise to the minimum TEC values after sunset. These results are similar to findings of Bolaji *et al.*, (2012), Fayose *et al.*, (2012), Okoh *et al.*, (2014), Eyelade *et al.*, (2017) who have explored the NEI.

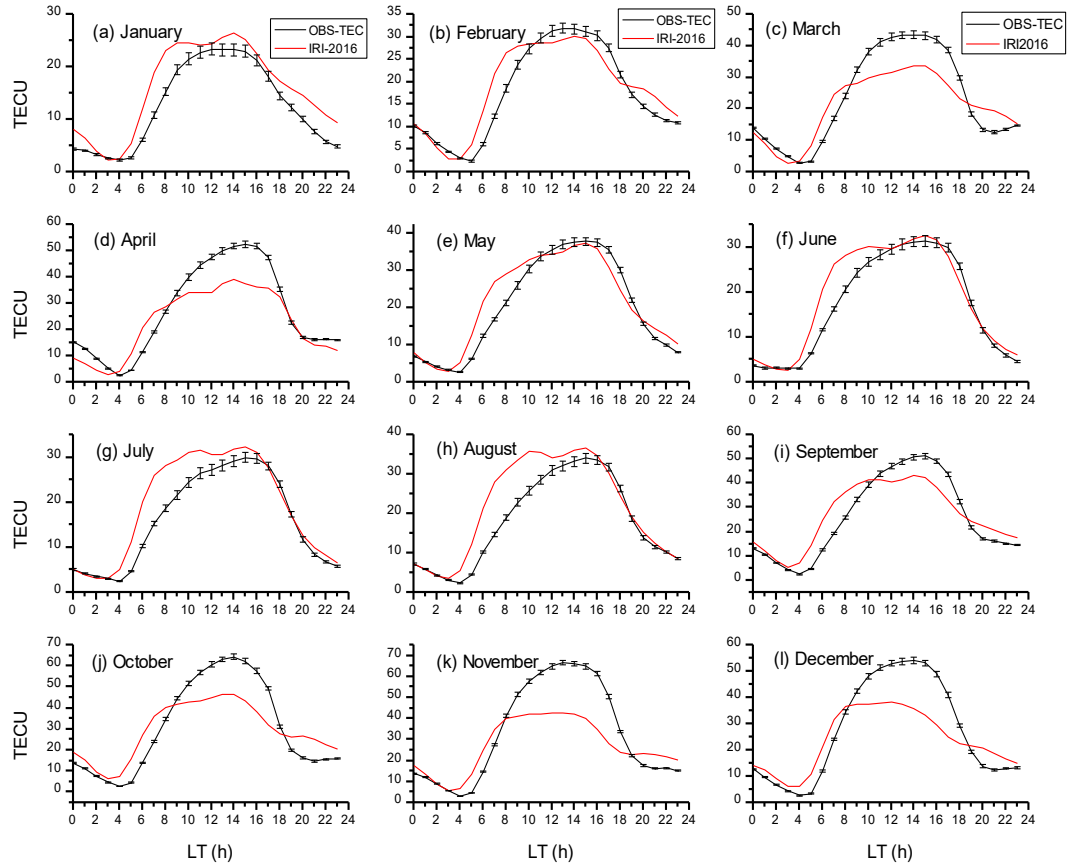

Figure 1: Diurnal variation of OBS-TEC showing error bar and IRI-2016 model of each month during January – December 2011 at Birnin-Kebbi

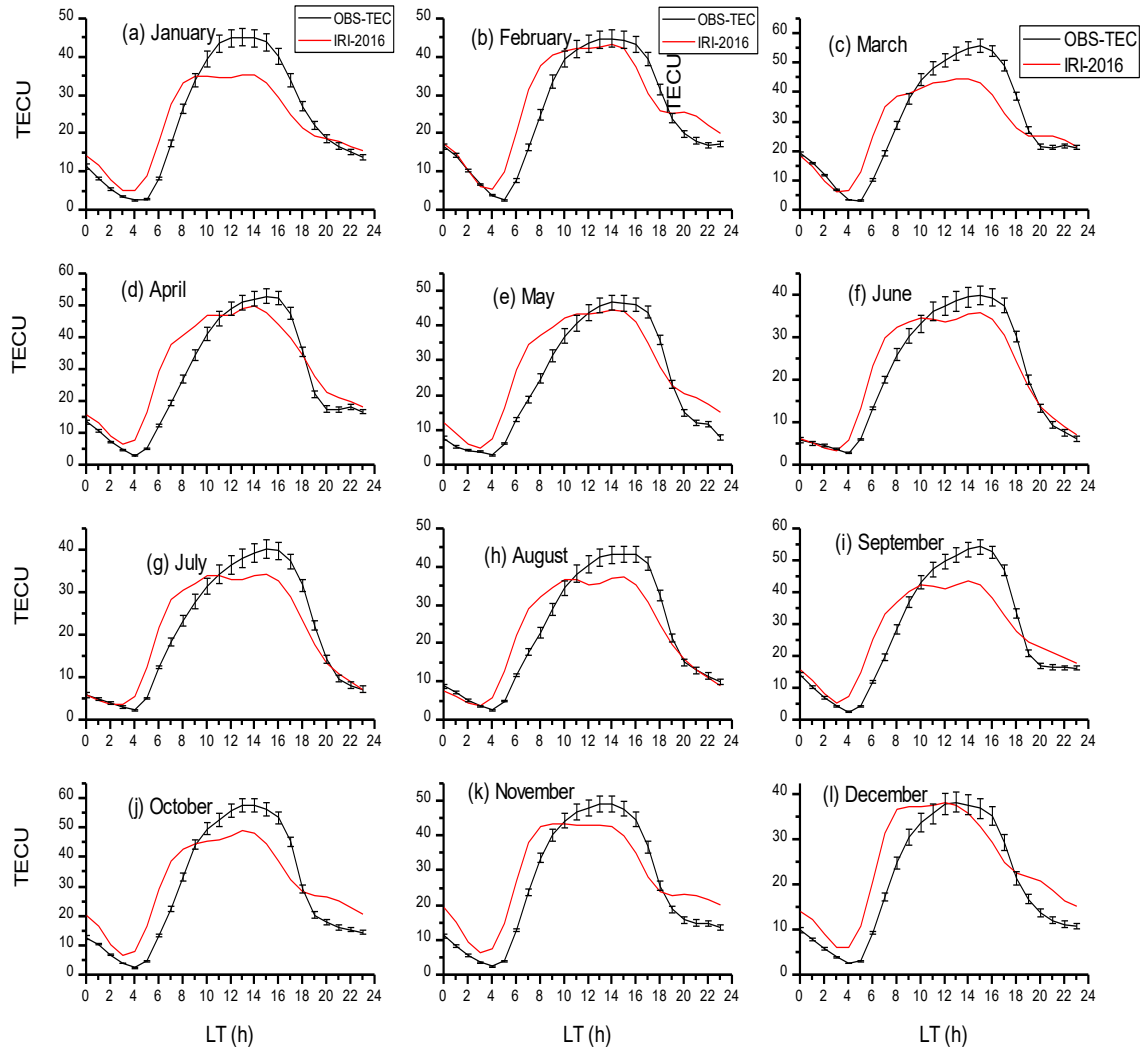

Figure 2: Same as Figure 1 for 2012.

221

222

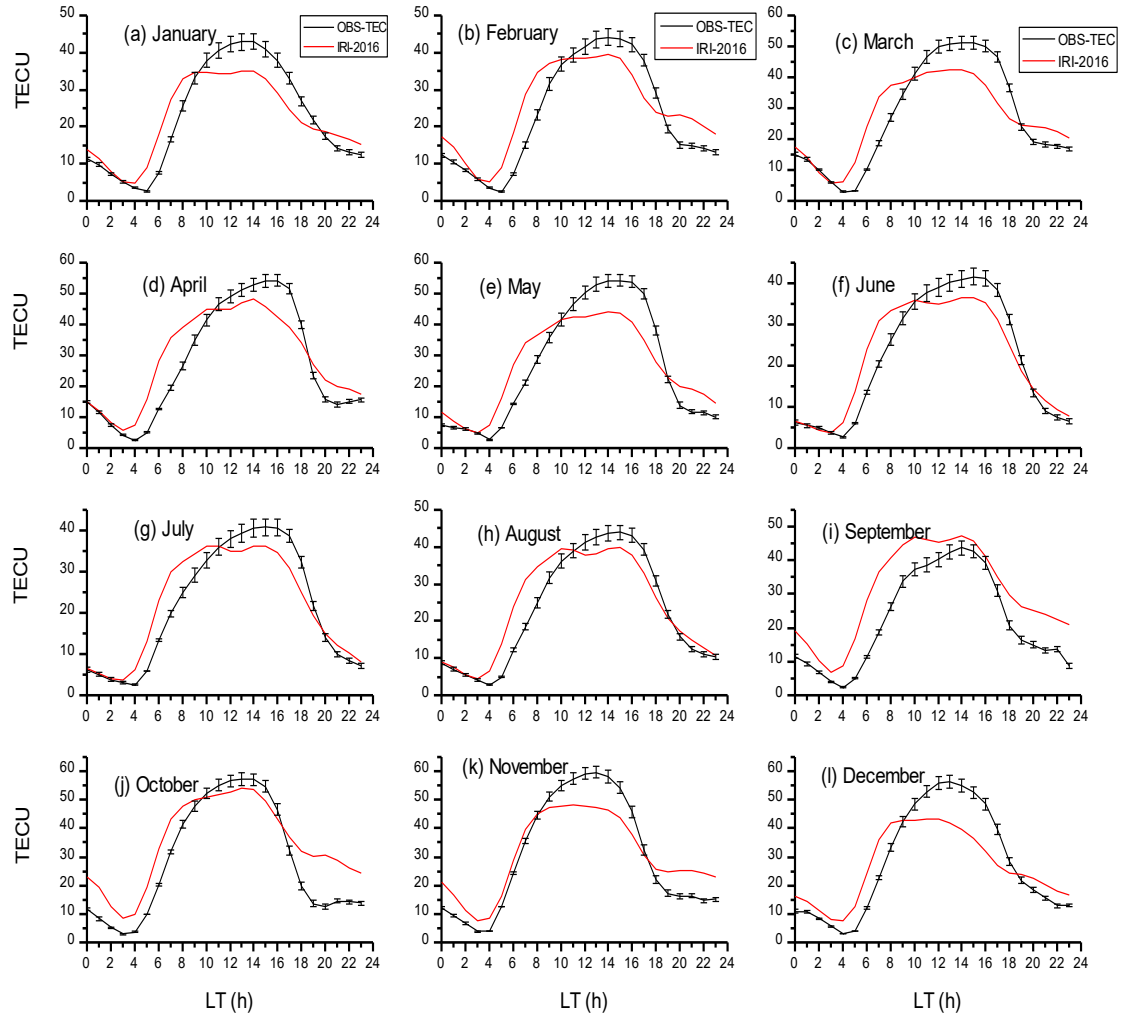

Figure 3: Same as Figure 1 for 2013.

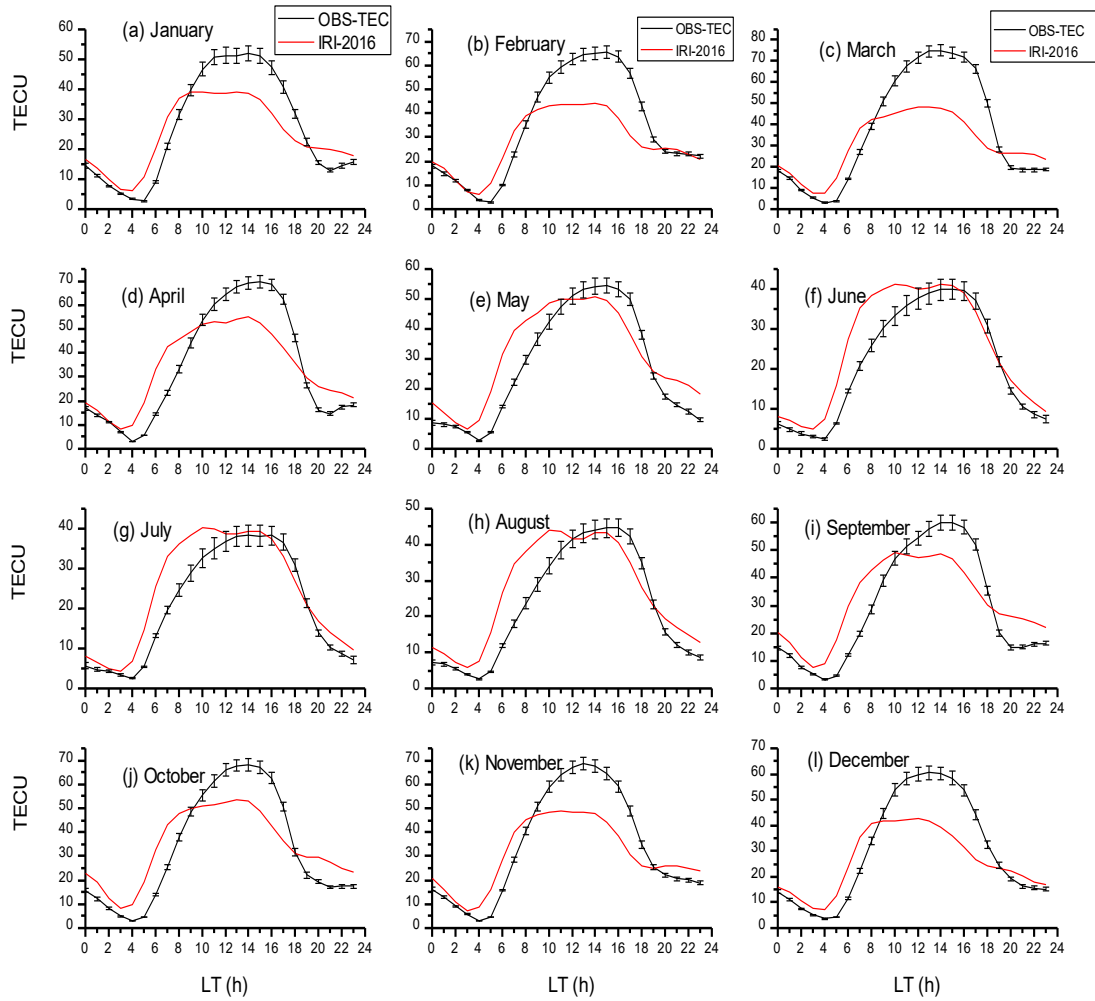

Figure 4: Same as Figure 1 for 2014.

It can be seen that OBS-TEC is much higher in 2014 with maximum values up to 70 TECU in March compared with IRI-2016 maximum of 54 TECU in the month of October, 2014. The diurnal variation reveals that the peak of OBS-TEC of some months shifted to 13:00 – 14:00 LT. For example, the months of April, July, August and September in 2011, March, April, June and September in 2012, April, June, July and September in 2013 showed this delayed peak. The OBS-TEC peaks in the months of April, May, June, August and September of 2014 also shifted to 13:00

– 14:00 LT. This type of peak shifting is peculiar to the Polar Regions and it is found to depend on the solar zenith angle. Another major phenomenon seen in the diurnal variation of OBS-TEC is the post-sunset decrease and slight enhancement in some months. The night time enhancement of TEC, for example, March, April and October of the year 2011, March and April of the year 2012, March, April, September and October of the year 2013, January, April and September of the year 2014 was documented by previous researchers like Rama Rao *et al.*, 2009; D’ujanga *et al.*, 2017. They attributed it to the product of eastward and westward directed electric field which produces an upward and downward motion of ionospheric plasma during the day and night respectively.

Figures 5 to 8 shows the diurnal variation of percentage deviation of IRI-2016 model from OBS-TEC in the Nigerian Equatorial Ionosphere (NEI) for all years respectively. On a general note, IRI-2016 model only presented suitable predictions for the post-midnight hour between 00 – 05hr of the day for all years. All other hours from 06 – 23hr shows some discrepancies. In some months, these discrepancies lasted throughout the day for example, in the months of October, November and December of 2012, October and December, 2013, and September and October of 2014, while in some other months these discrepancies collapsed during the pre-midnight hours, for example, in the months of June, July and August of 2011, June, July and August of 2012, June and August of 2013 and February, June and July of 2014. It is also important to mention that IRI-2016 model either over estimated or under estimated TEC in the NEI especially during daytime hours as shown in plots.

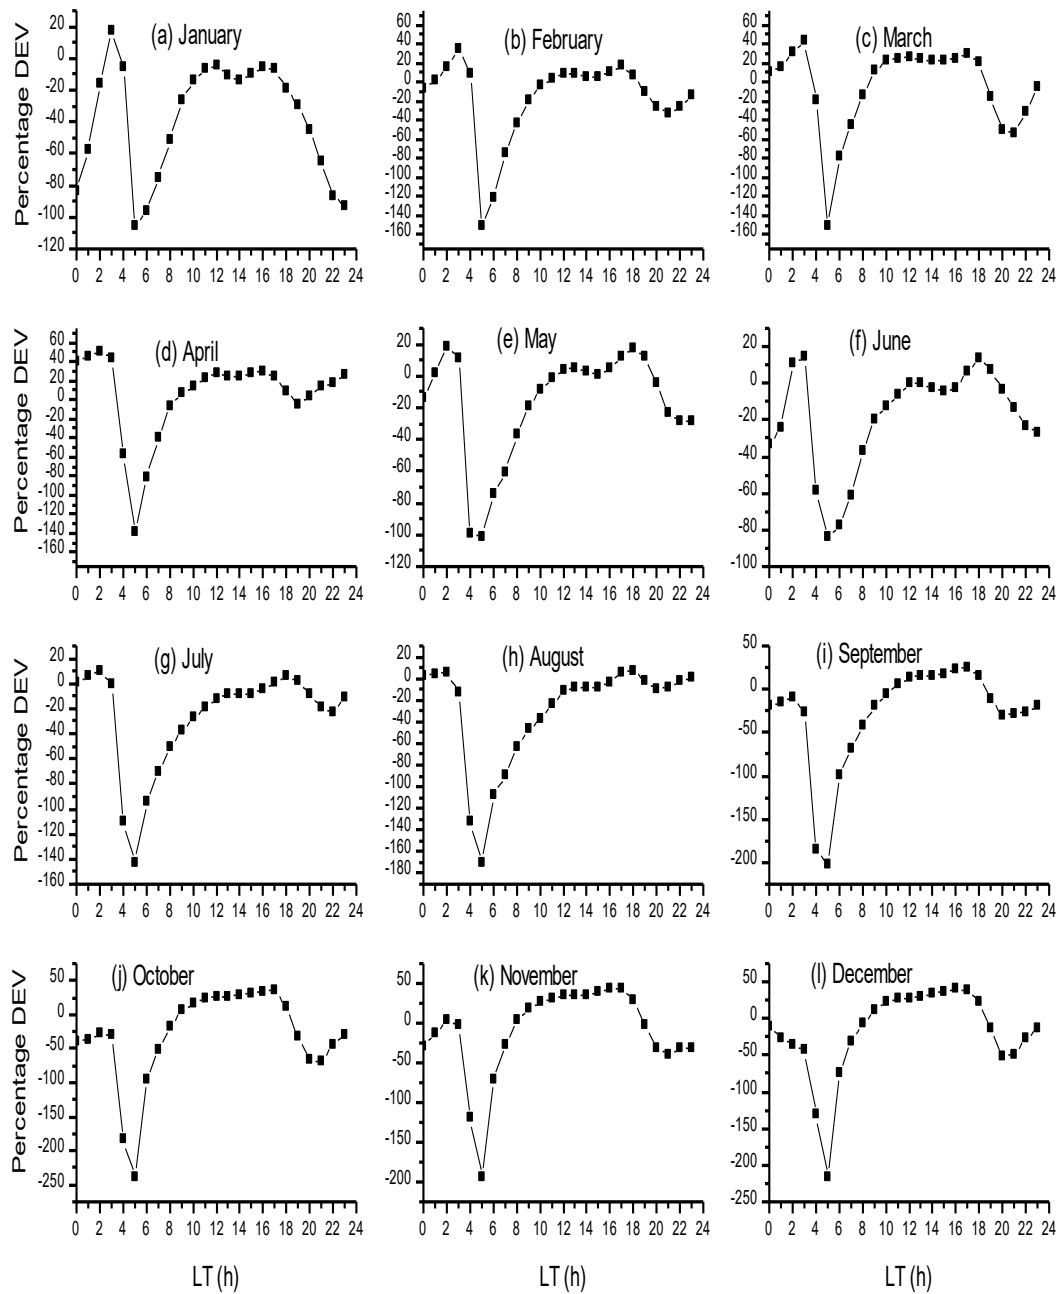

Figure 5: Percentage deviation of IRI-2016 from OBS-TEC for year 2011

259

260

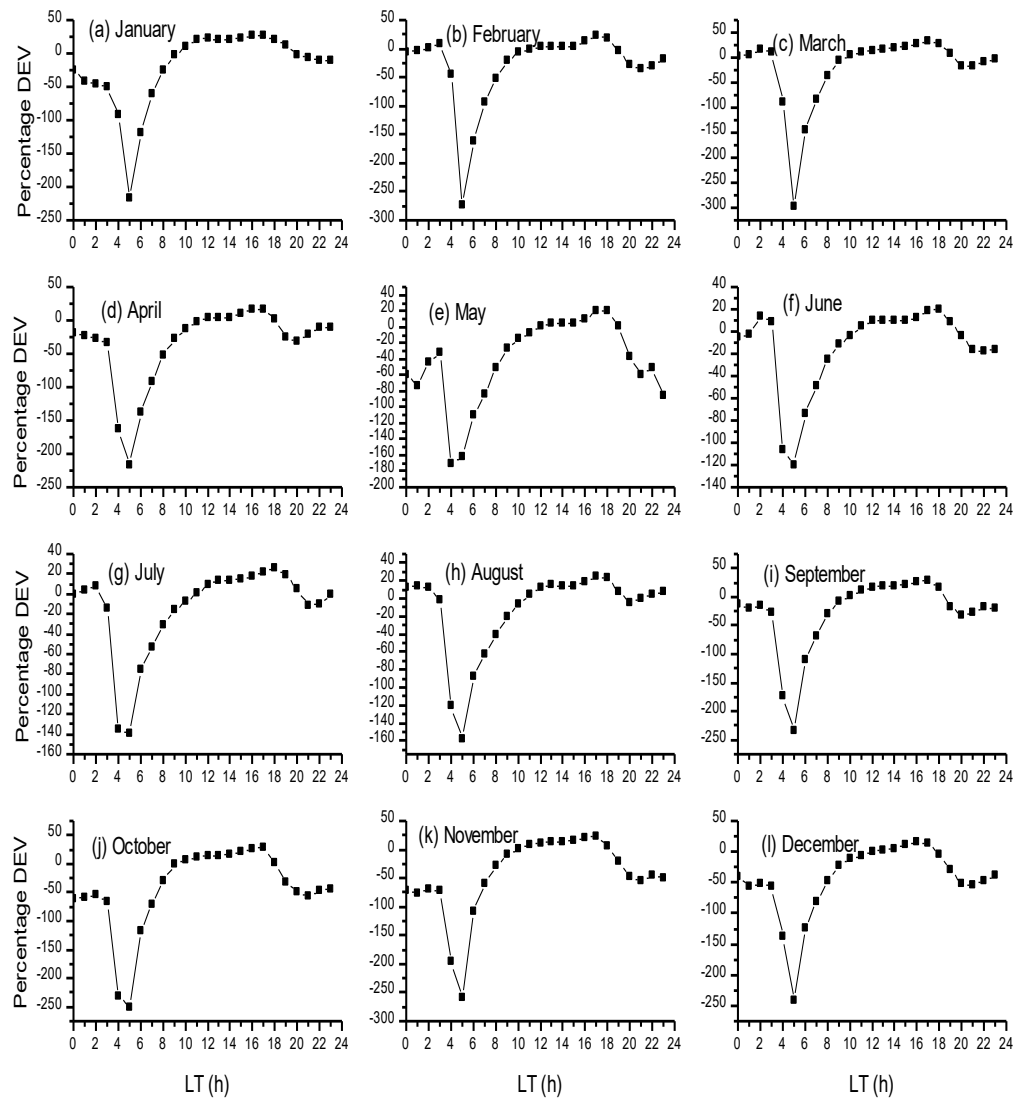

Figure 6: Percentage deviation of IRI-2016 from OBS-TEC for year 2012



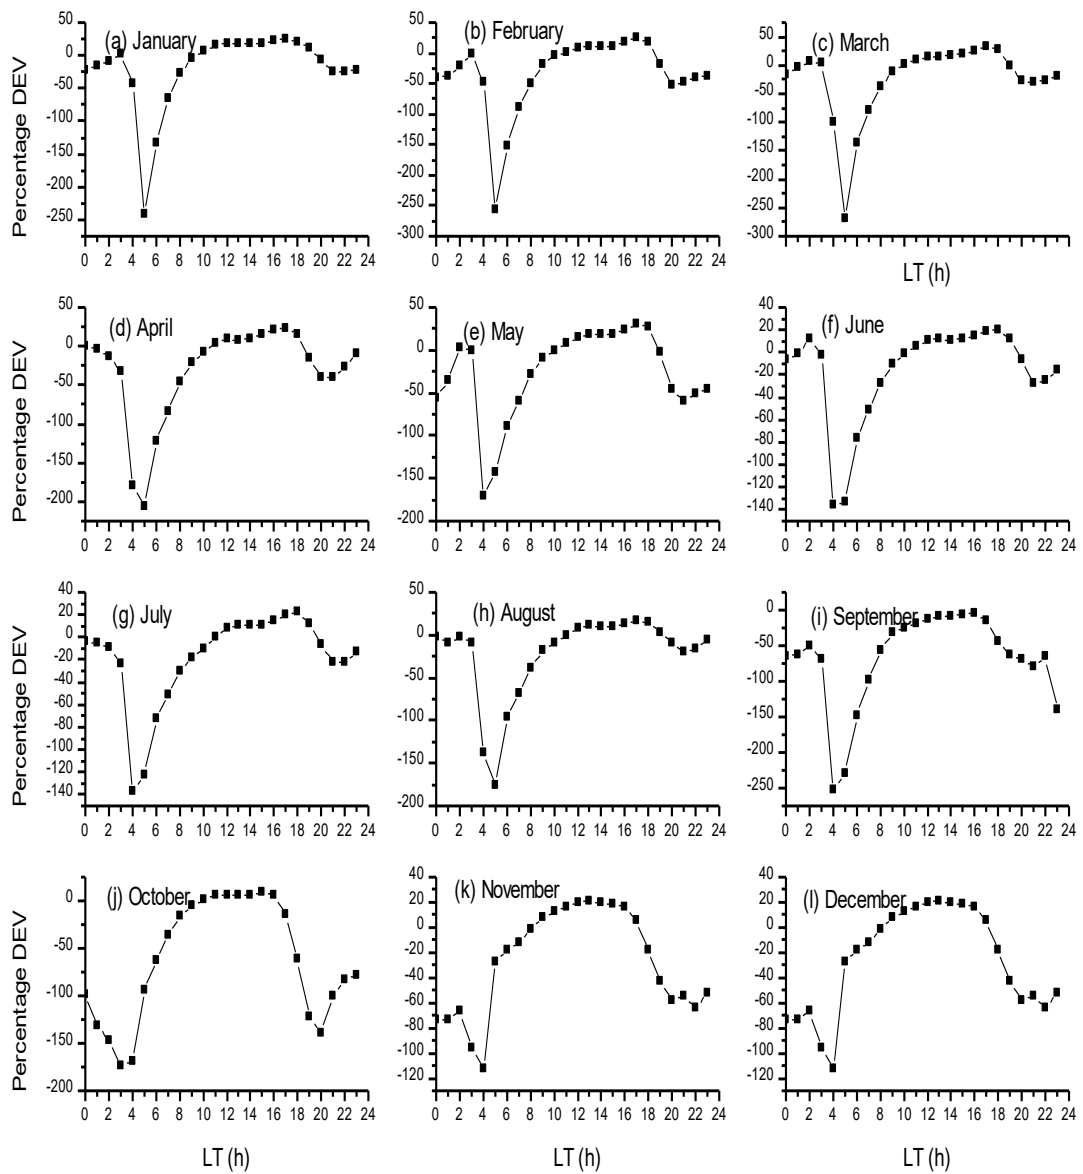

Figure 7: Percentage deviation of IRI-2016 from OBS-TEC for year 2013

265

266

267

268

269

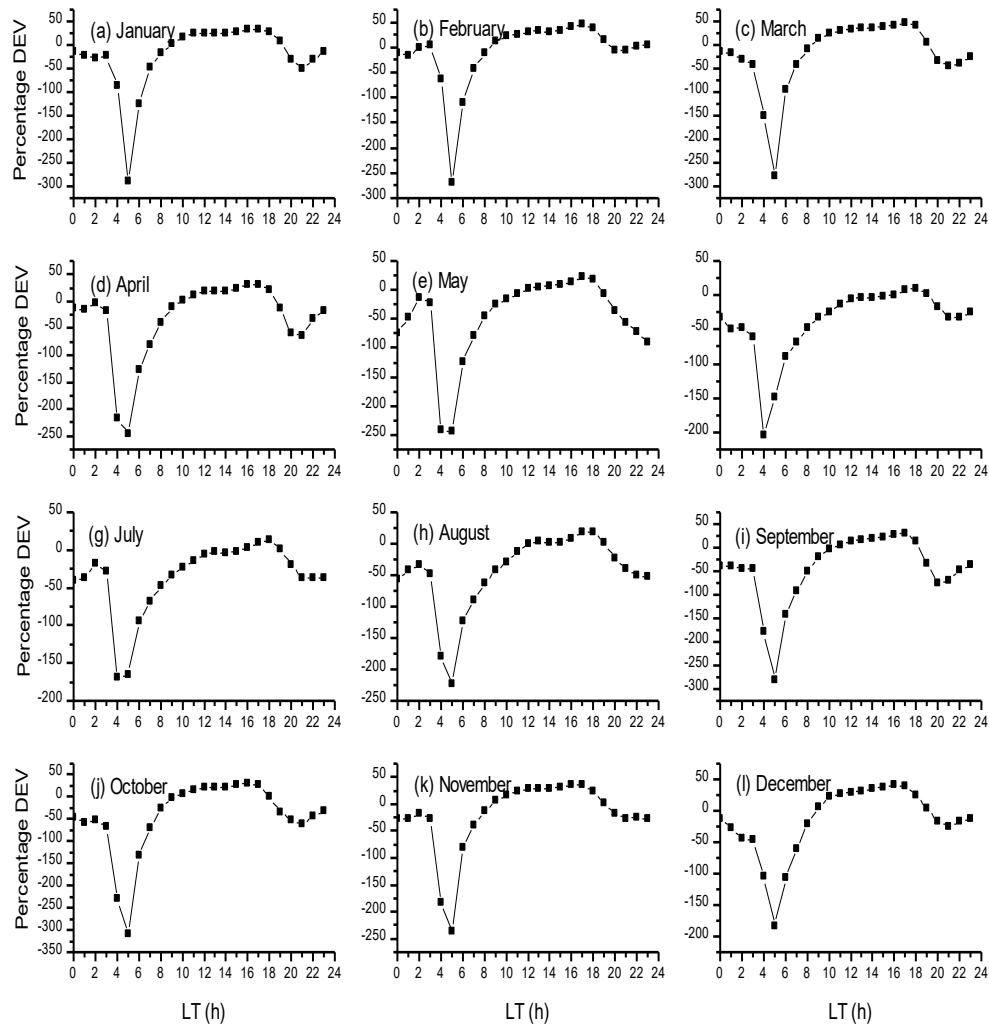

Figure 8: Percentage deviation of IRI-2016 from OBS-TEC for year 2014

The mass plots in the Figures 5 - 8 further reveal that negative percentage deviation shows higher values of IRI-2016 than OBS-TEC values. The reverse is the case for positive percentage deviation. Highest negative percentage deviations are seen between 04 – 05 LT for all months throughout the years in this study. Highest Negative percentage deviation of ~ 300% was recorded in the month of October, 2014 at 05 LT. Table II shows the summary of months with daytime over- or under-estimate of IRI-2016 in the NEI.

Table II: Months of daytime estimate of IRI-2016 model in NEI [Source: Author]

| YEAR | OVER ESTIMATE         | UNDER ESTIMATE                            | SAME RANGE |
|------|-----------------------|-------------------------------------------|------------|
| 2011 | January, July, August | February – April, September -<br>December | May - June |
| 2012 |                       | January - December                        |            |
| 2013 | September             | January – August, October -<br>December   |            |
| 2014 |                       | January - December                        |            |

Therefore, it is clear from the Figures 1 - 4, Figures 5 – 8 and Table II that IRI-2016 model did not predict well in the NEI. This may be attributed to insufficient data which is as a result of the sparse distribution of GPS infrastructure in this region.

Figure 9 show plots the seasonal variations of OBS-TEC for the four years under investigation. The change in concentration of Oxygen and molecular Nitrogen has been reported to be the main cause of seasonal variation of ionospheric parameters. Seasonal variation of OBS-TEC in this study depicts semi-annual variation with equinoctial maximum (~ 52 TECU) and solsticial minimum (~ 44 TECU) in 2012. D’ujanga *et al.*, (2017) reported that since the sun passes through the equator during the equinox, both March and September equinox experience the same solar radiation. It is also a well-established fact that March 20 and September 23 are the only times in the year when the solar terminator is perpendicular to the equator, giving rise to the equinoctial maximum. The semi-annual variation resulting from the effect of equatorial ionization anomaly (EIA) in the ionosphere has been attributed to the effect of solar zenith angle and magnetic field geometry (Wu *et al.*, 2008; Rama Rao *et al.*, 2006a). Another important feature of ionospheric

parameters (known as equinoctial asymmetry) which is reported in the work of Bolaji *et al.*, (2012); Akala *et al.*, (2013); Eyelade *et al.*, (2017); D'ujanga *et al.*, (2017); Aggarwal *et al.*, (2017), is clearly seen in all years used in this work. Akala *et al.*, (2013) also reported minimum and maximum seasonal VTEC values during December solstice and June solstice respectively, during ascending phase of solar cycle 24. Equinoctial asymmetry is a strong phenomenon in low latitudes (Aggarwal *et al.*, 2017). The equinoctial asymmetry has been explained in terms of the differences in the meridional winds leading to changes in the neutral gas composition during the equinoxes.

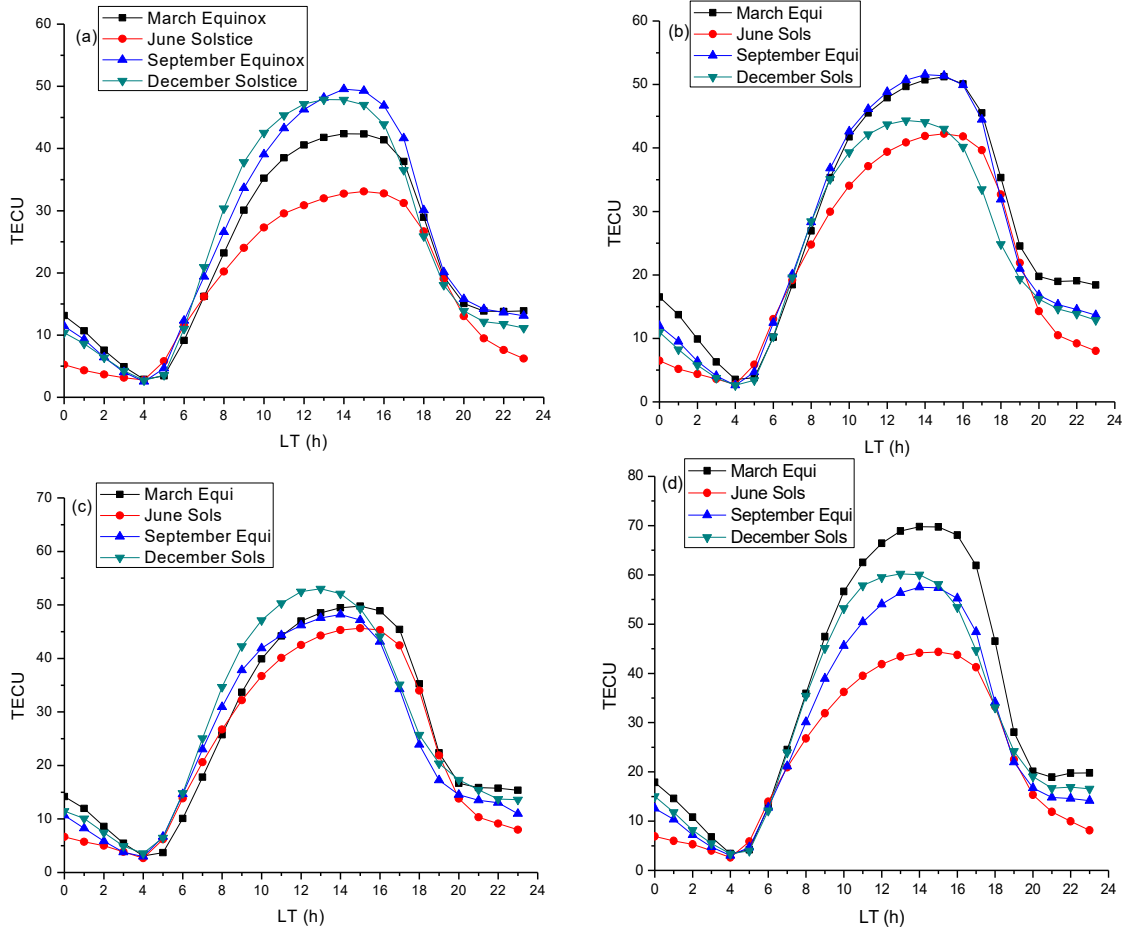

Figure 9: Seasonal variation of observed OBS-TEC during (a) 2011 (b) 2012 (c) 2013 and (d) 2014

In 2011 and 2014, the seasonal variation of OBS-TEC in the ionosphere did not follow the pattern reported by these researchers. In 2011, September equinox and December solstice recorded higher magnitude, followed by March equinox; the lowest was in June solstice. In 2013, December solstice magnitude was highest, followed by the equinoxes, March and September respectively and lowest in June solstice. This corresponds to result obtained by Akala *et al.* (2013), which they attributed to increase in ion production rate in winter season and anti-correlation between December and June Solstice pre-reversal velocity enhancement. In 2014, March equinox and December solstice magnitudes were higher than September equinox and June solstice magnitudes. December solstice magnitude is found to occur between the magnitudes of the equinoxes in 2011 and 2014. The September equinox magnitude and March equinox magnitude are observed to interchange in 2011 and 2014. Overall, June solstice magnitudes were lowest during all the years. This is due to low ionization resulting from reduced production rates, i.e. O/ N<sub>2</sub> ratio (Titheridge 1974). Also, for all seasons, pre-midnight (18 – 23 LT) values of TEC are higher than post-midnight (00 – 05 LT) TEC values for all years. In 2011, pre- midnight TEC values are in the range of 8 – 30 TECU while post-midnight TEC values ranges from 3 to 13 TECU. In 2012, pre-midnight TEC values are in the range of 9 – 35 TECU while post-midnight TEC values are between 3 to 17 TECU. In 2013, the pre-midnight TEC values are between 9 – 35 TECU while post-midnight TEC values ranges from 3 – 15 TECU. Finally in 2014, pre-midnight TEC values are between 9 to 47 TECU while the post-midnight TEC ranges from 3 to 18 TECU. Furthermore, the maximum OBS-TEC values in 2011 (49 TECU) and 2012 (52 TECU) were recorded in September Equinox season. In 2013, OBS-TEC reached a maximum of 53 TECU in December solstice while in 2014, the maximum OBS-TEC (70 TECU) was recorded in March Equinox season. This result agrees in general with those of D’ujanga *et al.* (2017) who obtained higher TEC values during the

equinoxes than during the solstices. This same result was observed by Bagiya *et al.* (2009) that TEC values are high in equinoctial months than solstitial months. Seasonal variation of TEC is dependent on thermospheric neutral compositions since during the day the equator is hotter than the pole. Meridional winds therefore flows from the equator towards the pole. This flow cause a change in the neutral composition resulting in the decrease of the ratio of O/ N<sub>2</sub> at the equator. The decrease which is maximum at the equinox result in higher TEC values at the equinox (Bagiya *et al.*, 2009). The corresponding annual range error (meters) of the season with maximum OBS-TEC using 1 TECU variation to represent an error of 0.16m in position is summarized in Tables III.

Table III: Season of maximum OBS-TEC and their corresponding range error.

| YEAR | SEASON OF<br>MAXIMUM OBS-TEC | VALUE<br>(TECU) | CORRESPONDING<br>ERROR (m) |
|------|------------------------------|-----------------|----------------------------|
| 2011 | September Equinox            | 49              | 8                          |
| 2012 | September Equinox            | 52              | 8                          |
| 2013 | December Solstice            | 53              | 8                          |
| 2014 | March Equinox                | 70              | 11                         |

Figure 10 shows the comparison of the monthly OBS-TEC and sunspot number, Rz from 2011 – 2014, showing an increase of TEC with solar cycle. Our result is in good agreement with those of Chakrabarty *et al.* (2012) and D’ujanga *et al.* (2017). The former authors reported a direct solar effect on TEC while the latter authors observed that the trend in TEC follow that of solar parameters. The present result also agrees with that of Rama Rao *et al.* (1985) who reported a direct solar control on TEC. Ionospheric climatology especially solar activity and the equatorial

ionization anomaly (EIA) effects of the ionosphere provides an insight into space weather events (Liu *et al.*, 2011).

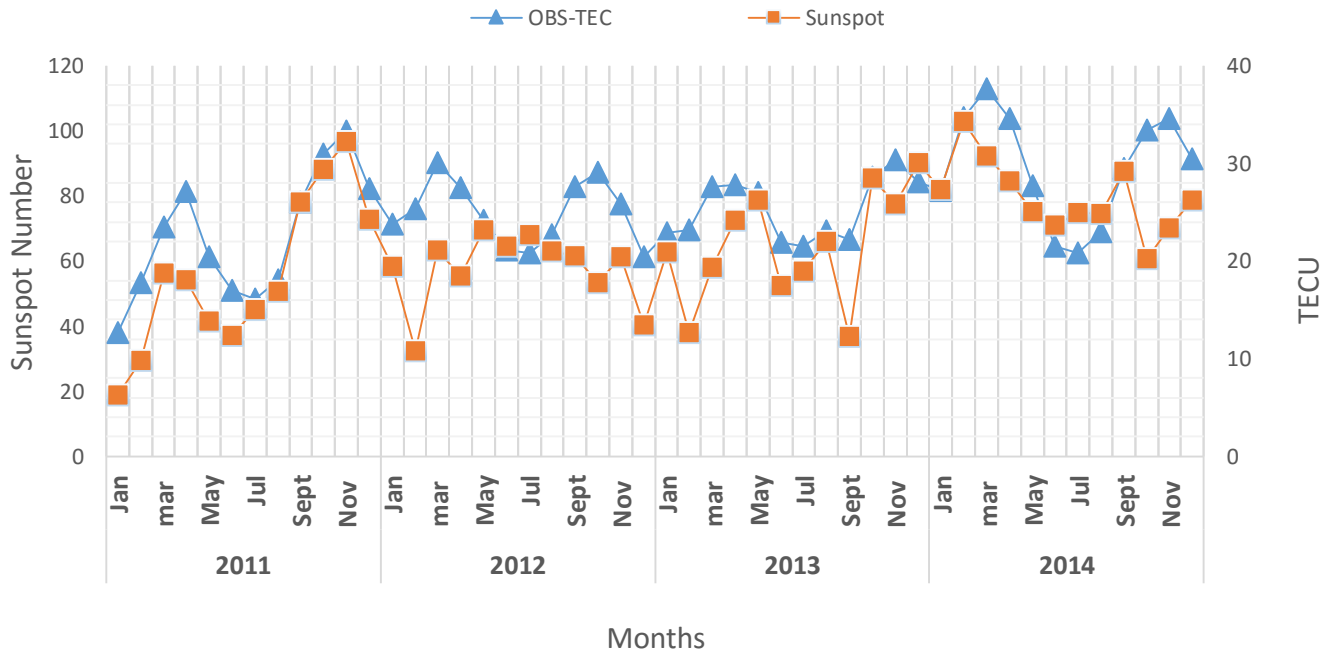

Figure 10: Annual variation of OBS-TEC and sunspot number, Rz

## CONCLUSIONS

Studies on OBS-TEC and IRI-2016 model at Birnin-Kebbi in Northern Nigeria during the ascending and maximum phases of solar cycle 24 have been carried out. The result obtained reveals the following:

1. Day-to-day variations of TEC were observed to be higher during the daytime than nighttime for all the years. During the day, the sun causes variations in temperature, neutral wind, electron density and electric field in the ionosphere. The diurnal variation shows a steep rise in OBS-TEC from a minimum of ~2 TECU between 03:00 – 05:00 LT in 2011,

~3 TECU (04:00 – 05 LT) in 2012, ~3 TECU (03:00 – 05:00 LT) in 2013 and 2014. OBS-TEC increased to a broad daytime maximum between 12:00 LT – 14:00 LT for all years before falling to a minimum after sunset. Magnetic field tubes are rapidly filled up at dawn resulting in the increase of extreme ultraviolet (EUV) ionization (Anderson *et al.*, 2004; D’ujanga *et al.*, 2017). The diurnal variation of IRI-2016 model shows TEC rising from a minimum of ~ 2 TECU in 2011, ~ 4 TECU in 2012 and 2013, and ~ 5 TECU in 2014 between 03:00 – 04:00 LT, to a broad daytime peak between 08:00 – 14:00 LT, before falling to a minimum before sunset.

2. The diurnal variation reveals that the peak of OBS-TEC of some months were delayed till after-noon. Post-sunset decrease and enhancement due to pre-reversal zonal electric field after sunset, were also observed in the diurnal variation of OBS-TEC in some months.
3. On a general note, it can be concluded that IRI-2016 model and OBS-TEC show some discrepancies throughout the day except during the post-midnight hours (00 – 05 LT) in the NEI.
4. For all seasons, pre-midnight (18 – 23h) values of TEC are higher than post-midnight (00 – 05h) TEC values during all years. In 2011, pre- midnight TEC values are in the range of 8 – 30 TECU while post-midnight TEC values ranges from 3 to 13 TECU. In 2012, pre-midnight TEC values are in the range of 9 – 35 TECU while post-midnight TEC values are between 3 to 17 TECU. In 2013, the pre-midnight TEC values are between 9 – 35 TECU while post-midnight TEC values ranges from 3 – 15 TECU. Finally in 2014, pre-midnight TEC values are between 9 to 47 TECU while the post-midnight TEC ranges from 3 to 18 TECU.



5. Maximum OBS-TEC values in 2011 (49 TECU) and 2012 (52 TECU) were recorded in September Equinox season. In 2013, OBS-TEC reached a maximum of 53 TECU in December solstice while in 2014, the maximum OBS-TEC (70 TECU) was recorded in March Equinox season. This result agrees in general with those of D’ujanga *et al.* (2017) and Bagiya *et al.* (2009) who obtained higher TEC values during the equinoxes than during the solstices. Seasonal variation of TEC is dependent on thermospheric neutral compositions since during the day the equator is hotter than the poles.
6. Finally, annual variation of OBS-TEC and sunspot number,  $R_z$  reveal the strong dependence of TEC on solar activity (sunspot number). Solar activity and the equatorial ionization anomaly (EIA) effects of the ionosphere provides an insight into space weather events. OBS-TEC and sunspot number were found to increase gradually from 2011 to 2014. Rama Rao *et al.* (1985) who reported a direct solar control on TEC.

## ACKNOWLEDGEMENT

We thank the Office of the Surveyor General of the Federation (OSGoF) for making TEC data available through the infrastructure [www.nignet.net](http://www.nignet.net). We also thank Hatanaka, Y., Gopi Krishna for providing TEC processing software online. Finally, we appreciate Bilitza *et al.* (2017) for making the latest version of IRI model available online.

## REFERENCES

Aggarwal, M., Bardhan, A., Sharma, D.K. Equinoctial asymmetry in ionosphere over Indian region during 2006 – 2013 using COSMIC measurements. *Advances in Space Res.*, 60, 999 – 1014, 2017.

407 Akala, A.O., Somoye, E.O, Adeloye, A.B., Rabiou, A.B. Ionospheric  $f_oF_2$  variability at equatorial  
 408 and low latitudes during high, moderate and low solar activity. Indian Journal of Radio and Space  
 409 Physics.Vol. 40, pp 124 – 129, 2011.

410 Akala, A.O., Seemala, G.K., Doherty, P.H., Valladares, C.E., Carrano, C.S., Espinoza, J., and  
 411 Oluyo, K.S. Comparison of equatorial GPS-TEC observations over an African station and an  
 412 American station during the minimum and ascending phases of solar cycle 24. Ann. Geophys., 31,  
 413 2085, 2013.

414 Alizadeh, M.M., Wijaya, D.D., Hobiger, T., Weber, R., Schuh, H. Ionospheric effects on  
 415 microwave signals in J. Bohm and H. Schuh (eds). Atmospheric Effect in Space Geodesy. Springer  
 416 atmospheric sciences. Doi: 10.1007/978-3-642-36932-2\_2, © Springer-Verlag Berlin Heidelberg,  
 417 2013.

418 Anderson, D., Anghel, A., Chau, J., Veliz, O. Daytime vertical  $\mathbf{E} \times \mathbf{B}$  drift velocities inferred from  
 419 ground-based magnetometer observations at low latitudes, Space Weather, 2, S11001; doi:  
 420 10.1029/2004SW000095.

421 Ayorinde, T.T., Rabiou, A.B., and Amory-Mazaudier, C. Inter-hourly variability of Total Electron  
 422 Content during the quiet condition over Nigeria within the Equatorial Ionization Anomaly region.  
 423 J. Atmos. Solar Terr. Phys., 145, 21 – 33, 2016.

424 Bagiya, M.S., Joshi, H.P., Iyer, K.N., Aggarwal, M., Ravin-dran, S., and Pathan, B.M. TEC  
 425 variations during low solar activity period (2005 – 2007) near the Equatorial Ionization Anomaly  
 426 Crest region in India. Ann Geophys., 27, 1047 – 1057, 2009.

427 Bhuyan, P.K. and Borah, R.R. TEC derived from GPS network in India and comparison with the  
 428 IRI. Advances in Space Res., 39, 830 – 840, 2007.

429 Bilitza, D., Altadill, D., Zhang, Y., Mertens, C., Truhlik, V., Richards, P., McKinnell, L.A.,  
 430 Reinisch, B. International reference ionosphere 2012 – A model of international collaboration. J.  
 431 Space Weather Space Clim., 4, 1 – 12, doi: 10.1002/201JA018009, 2014.

432 Bilitza, D., Altadill, D., Truhlik, V., Shubin, V., Galkin, I., Reinisch, B., and Huang, X.  
 433 International reference ionosphere 2016: from ionospheric climate to real-time weather  
 434 predictions. Space weather, 15, 418 – 429, doi: 10.1002/20165SW001593, 2016.

435 Bolaji, O. S., Adeniyi, J.O., Radicella, S.M., and Doherty, P.H. Variability of total electron content  
 436 over an equatorial West African station during low solar activity. Radio Sci., 47, RS1001, doi:  
 437 10.1029/2011RS004812, 2012.

438 Chakrabarty, D., Bagiya, M.S., Thampi, S.V., Iyer, K.N. Solar EUV flux (0.1 – 50 nm),  $F_{10.7}$  cm  
 439 flux, sunspot number and total electron content in the crest region of the ionization anomaly during  
 440 the deep minimum between solar cycle 23 and 24. Indian Radio and Space Phys., 41, 110 – 120,  
 441 2012.

442 Ciruolo, L., and Spalla, P. TEC analysis of IRI simulated data. Adv. Space Res., 29, 6, 959 – 966,  
 443 2002.

444 Codrescu, M. V., Palo, S. E., Zhang, X., Fuller-Rowell, T. J., Poppe, C. TEC climatology derived  
 445 from TOPEX/POSEIDON measurements, Journal of Atmospheric Solution, 61, 281-298, 1999.

446 Dabas, R.S., Singh, L., Lakshmi, D.R., Subramanyam, P., Chopra, P., Garg, S.C. Evolution and  
 447 dynamics of equatorial plasma bubbles: relationships to  $\mathbf{E} \times \mathbf{B}$  drifts, post-sunset total electron  
 448 content enhancements, and equatorial electrojet strength. Radio Sci., 38, doi:  
 449 10.1029/2001RS002586, 2003.

450 D'ujanga, F.M., Opio, P. Twinomugisha, F. Variation of total electron content with solar activity  
 451 during the ascending phase of solar cycle 24 observed at Makerere University, Kampala. Space  
 452 Weather: Longitude and Hemispheric Dependences and Lower Atmosphere Forcing, Geophysical  
 453 Monograph 220, First Edition. Edited by Timothy Fuller-Rowell, Endawoke Yizengaw, Patricia  
 454 H. Doherty, and Sunanda Basu. © 2017 American Geophysical Union. Published 2017 by John  
 455 Wiley & Sons, Inc., 2017.

456 Eyelade, V.A., Adewale, A.O., Akala, A.O., Bolaji, O.S. and Rabi, A.B. Studying the variability  
 457 in the diurnal and seasonal variations in GPS TEC over Nigeria. Ann. Geophys., 35, 701 – 710,  
 458 2017.

459 Fayose, R.S., Rabi, B., Oladosu, O., Groves, K. Variation of total electron content (TEC) and  
 460 their effect on GNSS over Akure. Nigeria, Applied Physics Research, 4, 2, 2012.

461 Forbes, J.M., Bruinsma, S., Lemoine, F.G. Solar rotation effects in the thermospheres of Mars  
 462 and Earth. Science, 312, 1366–1368, 2006.

463 Gorney, D. J. Solar cycle effects on the near-earth space environment. Rev Geophys, 28, 315–  
 464 336, 1990.

465 Hajra, R., Chakraborty, S.K., Tsurutani, B.T., DasGupta, A., Echer, E., Brum, C.G.M., Gonzalez,  
 466 W.D., Sobral, H.A. An empirical model of ionospheric total electron content (TEC) near the crest  
 467 of the equatorial ionization anomaly (EIA). J. Space Weather Space Clim., 6, A29, doi:  
 468 10.1051/swsc/2016023, 2016.

469 Liu, L., Wang, W., Chen, Y., Le, H. solar activity effects on the ionosphere: A brief review. Space  
 470 Physics and Space Weather Geophysics. Chinese science Bulletin. 56, 12, 1202 – 1211, 2011.

471 Jee, G., Schunk, R. W., Scherliess, L. Analysis of TEC data from the TOPEX/Poseidon mission,  
 472 Journal of Geophysical Research, 109, A01301, doi:10.1029/2003JA010058, 2004.

473 Komjathy, A., Langley, R., Bilitza, D. ingesting GPS-derived data into the IRI for single frequency  
 474 radar altimeter ionospheric delay corrections. Adv. Space Res., 22, 6, 793 – 802, 1998.

475 Langley, R., Fedrizzi, M., Paula, E., Santos, M., Komjathy, A. Mapping the low latitude  
 476 ionosphere with GPS. GPS World, 13, 2, 41 – 46, 2002.

477 Lee, C.C. and Reinisch, B.W. Quiet condition hmF2, NmF2 and Bo variations at Jicamarca and  
 478 comparison with IRI-2001 during solar maximum. J. Atmos. Solar Terr. Phys., 68, 2138 – 2146,  
 479 2006.

480 Maruyama, T., Ma, G., and Nakamura, M. Signature of TEC storm on 6 November 2001 derived  
 481 from dense GPS receiver network and ionosonde chain over Japan. Journal of Geophysical  
 482 Research, 109, A10302, doi:10.1029/2004JA010451, 2004.

483 Okoh, D., Lee-Anne McKinnell, L., Cilliers, P., Okere, B., Okonkwo, C., Rabi, A.B. IRI-VTEC  
 484 versus GPS-vTEC for Nigerian SCINDA GPS stations. Advances in Space Research,  
 485 <http://dx.doi.org/10.1016/j.asr.2014.06.037>, 2014.

486 Ogunmodimu, O., Rogers, N.C., Falayi, E., Bolaji, S. Solar Flare induced cosmic noise absorption,  
 487 NRIAG Journal of Astronomy and Geophysics. 7, 1, 31-39, 2018.

488 Ogwala, A., Somoye, E.O., Oyedokun, O., Adeniji-Adele, R.A., Onori, E.O., Ogungbe, A.S.,  
 489 Ogabi, C.O., Adejo, O., Oluyo, K.S., Sode, A.T. Analyses of Total Electron Content over Northern  
 490 and Southern Nigeria. J. Res. and Review in Sci., 21 – 27, 2018.

491 Onwumechilli, C.A., and Ogbuehi, P.O. Journal Atmos. Terr. Phys., 26, 894, 1964.

492 Rama Rao, P.V.S., Niranjan, K., Rama Rao, B.V., Rama Rao, B.V.P.S., Prasad, D.S.V.V.D. Proc.  
 493 URSI/ IPS Conference on the ionosphere and Radio wave Propagation. Sydney, Australia, 1985.  
 494 Rama Rao, P.V.S., Krishna, S.G., Prasad, J.V., Prasad, S.N.V.S., Prasad, D.S.V.V.D., Niranjan,  
 495 K. Geomagnetic storm effects on GPS based navigation. Ann. Geophys., 27, 2101 – 2110, 2009.  
 496 Rama Rao, P.V.S., Krishna, S.G., Niranjan, K., Prasad, D.S.V.V.D. Study of temporal and spatial  
 497 characteristics of L-band scintillation over the Indian low-latitude region and their possible effects  
 498 on GPS navigation. Ann. Geophys., 24, 1567 – 1580, 2006a.  
 499 Rama Rao, P.V.S., Krishna, S.G., Niranjan, K., Prasad, D.S.V.V.D. Temporal and spatial  
 500 variations in TEC using simultaneous measurements from indian GPS network of receivers during  
 501 low solar activity period of 2004 – 2005. Ann. Geophys., 24, 3279 – 3292, 2006b.  
 502 Rama Rao, P.V.S., Niranjan, K., Prasad, D.S.V.V.D., Krishna, S.G., Uma, G. On the validity of  
 503 the ionospheric pierce point (IPP) altitude of 350km in the Indian equatorial and low-latitude  
 504 sector. Ann. Geophys., 24, 2159 – 2168, 2006c.  
 505 Suranya, P.L., Prasad, D.S.V.V.D., Niranjan, K., Rama Rao, P.S.V. Short term variability in foF2  
 506 and TEC over low latitude stations in the Indian sector. Indian J. of Radio and Space Phys., 44, 14  
 507 – 27, 2015.  
 508 Somoye, E.O. Diurnal and seasonal variation of fading rates of E- and F-region echoes during IGY  
 509 and IQSY at the equatorial station of Ibadan. Indian Journal of Radio and space Physics, 38, 194  
 510 – 202, 2010.  
 511 Somoye, E.O., Akala, A.O., Ogwala, A. Day-to-day variability of h'F and foF2 during some solar  
 512 cycle epochs. Journal Atmos. Solar Terr. Physics, 73, 1915 – 1922, 2011.

513 Stankov, S. M. Trans-ionospheric GPS signal delay gradients observed over mid-latitude Europe.  
514 *Advances in Space Research*, 43, 1314–1324, 2009.

515 Tariku, Y.A. Pattern of GPS-TEC variability over low-latitude regions (African sector) during the  
516 deep solar minimum (2008 to 2009) and solar maximum (2012 to 2013) phases. *Earth, Planets,*  
517 *and space*. 67, 35, 2015.

518 Titheridge, J.E. Changes in atmospheric composition inferred from ionospheric production rates.  
519 *J. Atmos. Terr. Phys.*, 36, 1249 – 1257, 1974.

520 Wanninger, L. Effects of the equatorial ionosphere on GPS. *GPS World*, 2, 48, 1993.

521 Wu, C.C., Liou, K., Shan, S.J., Tseng, C.L. Variation of ionospheric total electron content in  
522 Taiwan region of the equatorial anomaly from 1994 – 2003. *Adv. Space Res.*, 41, 611 – 616, 2008.

523

524
